# Supplementary material for: Step-up synthesis of amidoxime-functionalised periodic mesoporous organosilicas with an amphoteric ligand in the framework for drug delivery
Source: Royal Society of Chemistry journal article supplement (doi:10.1039/c2jm16341a), 2012-01-01
Supplement: c2jm16341a.pdf [file c2jm16341a.pdf]

## Electronic Supporting Information (ESI)

### Step-up synthesis of amidoxime-functionalised periodic mesoporous organosilicas with amphoteric ligand in the framework for drug delivery

Madhappan Santha Moorthy,<sup>a</sup> Sung-Soo Park,<sup>a</sup> Dong Fuping,<sup>a</sup> Sang-Hyun Hong,<sup>a</sup>  
M. Selvaraj,<sup>b</sup> and Chang-Sik Ha\*<sup>a</sup>

<sup>a</sup> Department of Polymer Science and Engineering, Pusan National University, Busan 609-735, South Korea.

<sup>b</sup> Department of Chemical and Biomolecular Engineering, Pusan National University, Geumjeong-gu, Busan 609-735, Korea.

### **Determination of drug loading into the mesoporous materials by thermogravimetric analysis (TGA)**

The loading weight percentage (W) of IBU and 5-FU in DU-PMAs was determined by thermogravimetric analysis as follows;

Fig. 8 shows three profiles of blank DU-PMA, IBU or 5-FU loaded DU-PMA, and blank IBU or 5-FU. The drug loading weight ratio (W) in the DU-PMA materials can be calculated by the equation.

$$\frac{B-W_1}{100-B} = \frac{T-W-W_2}{100-T}$$

where W1 and W2 represent the percentage weight loss of physically adsorbed water (< 100 °C) in the blank DU-PMA and IBU or 5-FU loaded DU-PMA, respectively.

B is the percentage weight loss corresponding to the adsorption of water, and organic content of blank DU-PMA samples and T represents the total weight loss percentage of adsorbed water and organic content of the framework, and IBU or 5-FU loaded in DU-PMA samples.

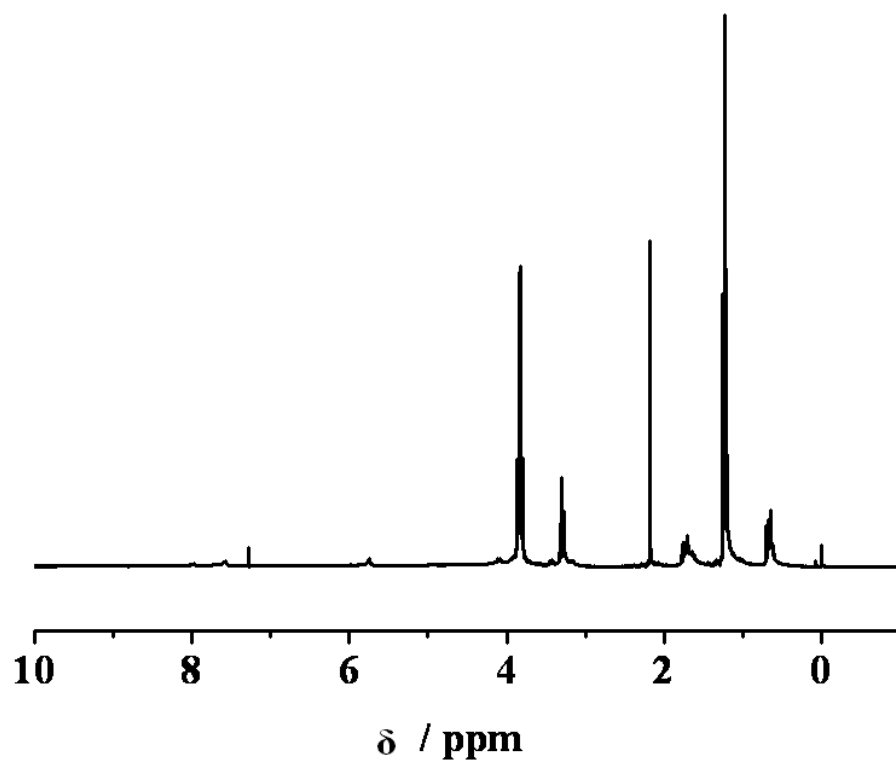

**Figure S1.**  $^1\text{H}$  NMR spectrum of 1,2-diureylenemaleonitrile precursor in  $\text{CDCl}_3$ .

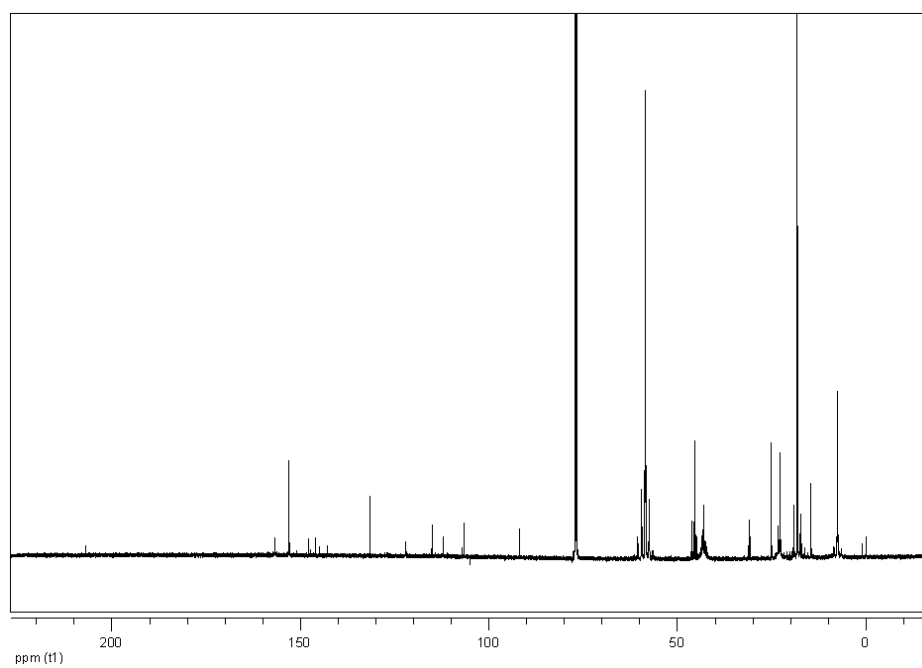

**Figure S2.**  $^{13}\text{C}$  NMR spectrum of 1,2-diureylenemaleonitrile precursor in  $\text{CDCl}_3$ .

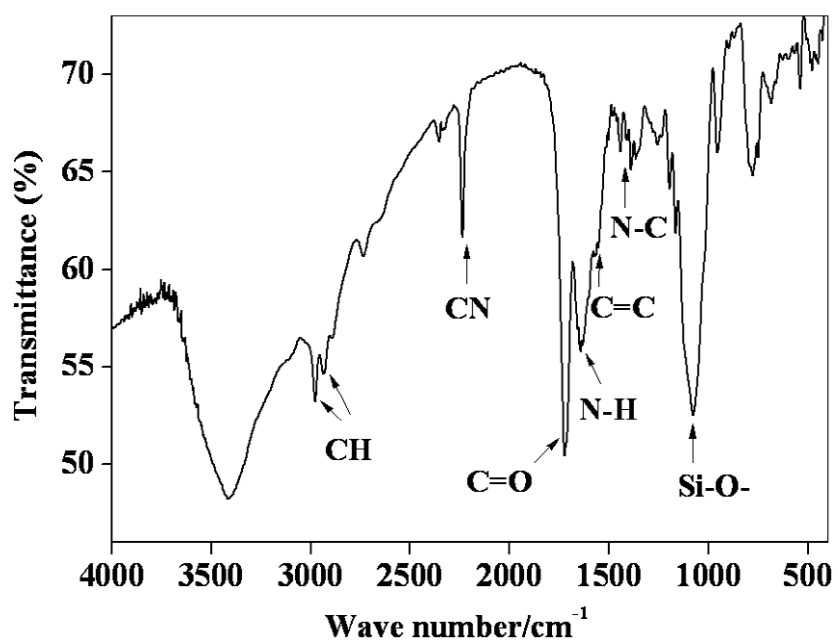

**Figure S3.** FT-IR spectrum of 1,2-diureylenemalonitrile precursor.

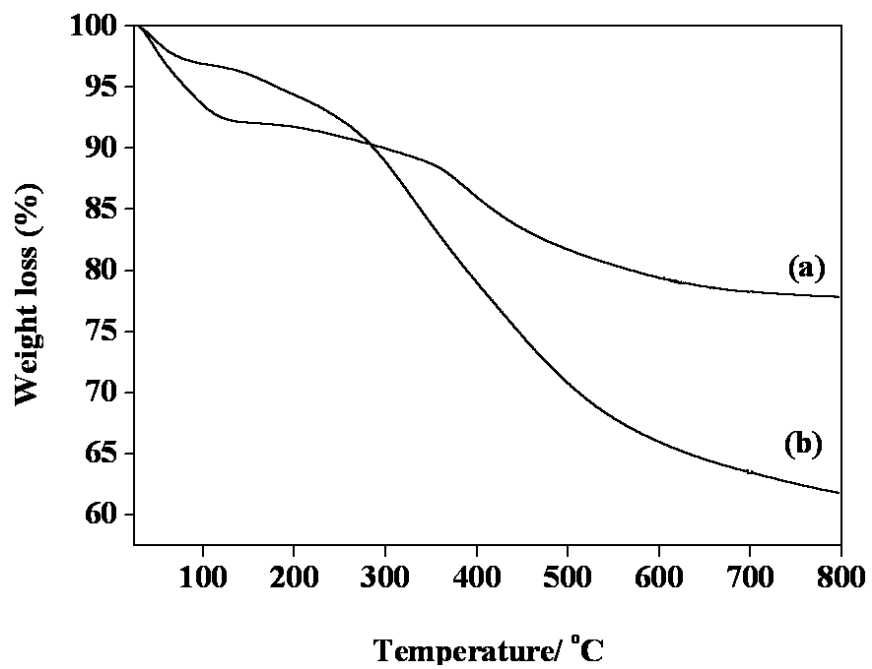

**Figure S4.** TGA curves of (a) DUMN-PMO-5 and (b) DUMN-PMO-40.

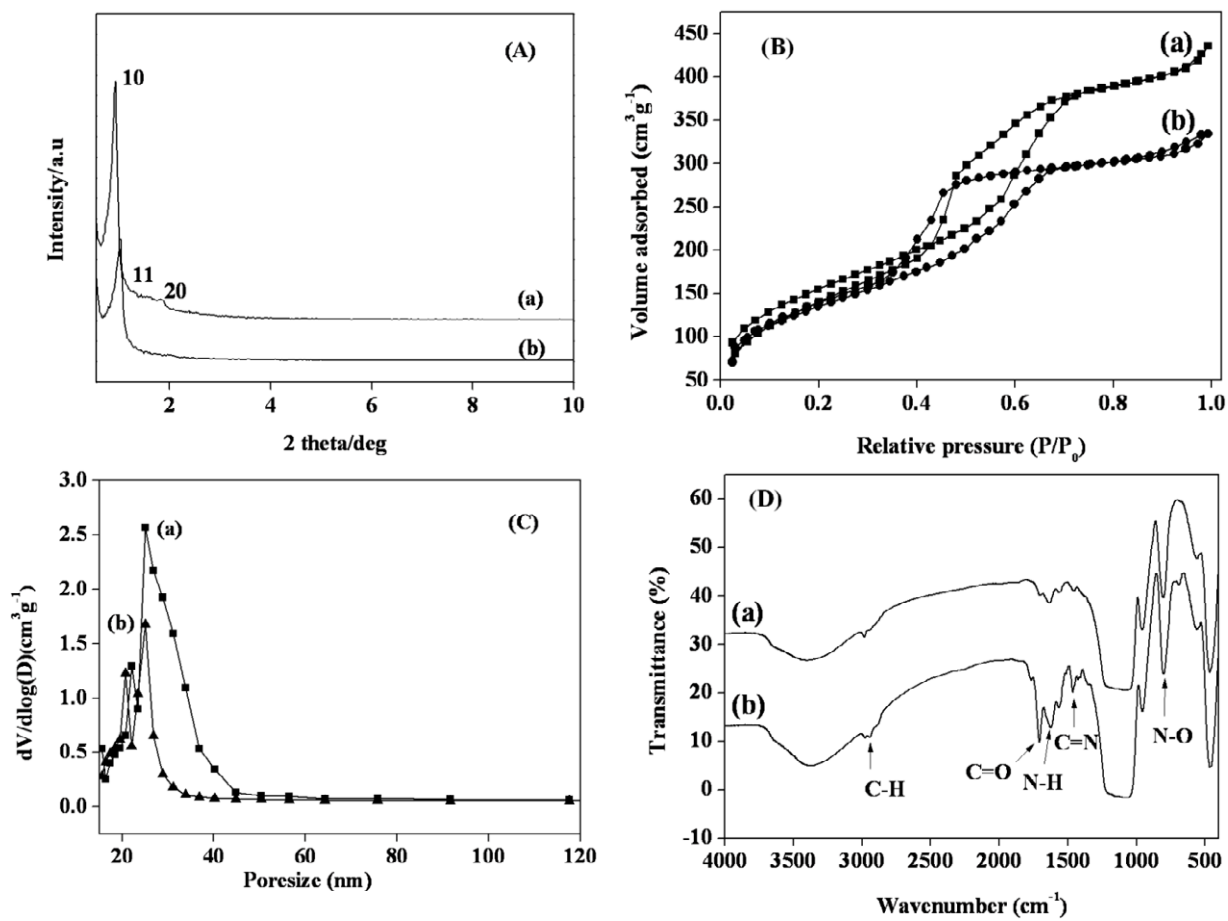

**Figure S5.** (A) XRD patterns, (B) N<sub>2</sub> adsorption-desorption isotherms, (C) Pore size distributions and (D) FT-IR spectra for DU-PMA-5 and DU-PMA-20.

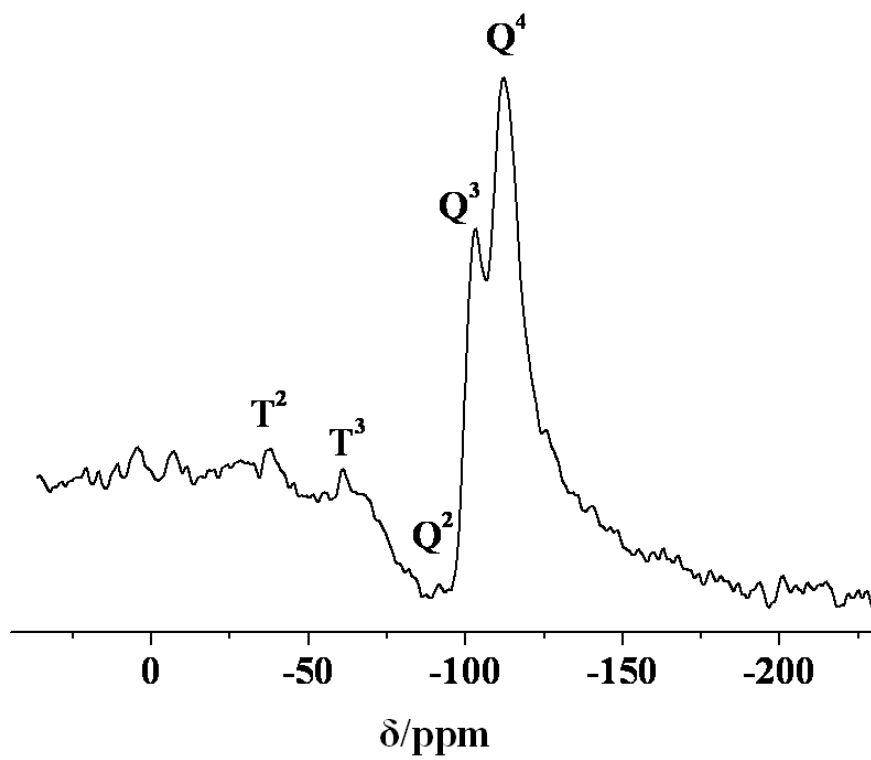

**Figure S6.**  $^{29}\text{Si}$  MAS NMR spectrum of DU-PMA-20.



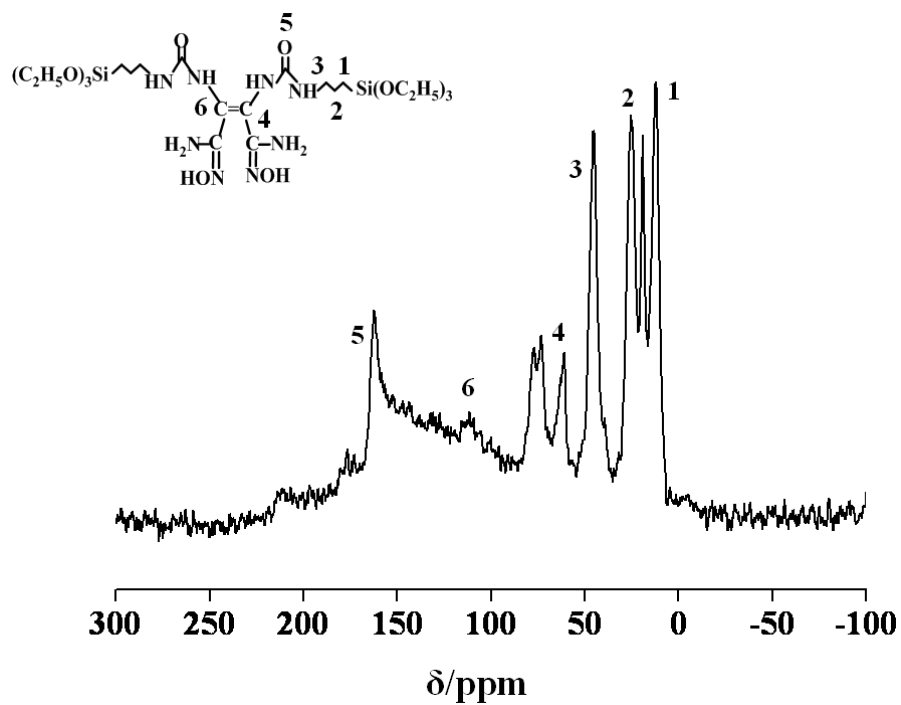

**Figure S7.**  $^{13}\text{C}$  CP MAS NMR spectrum of DU-PMA-20.

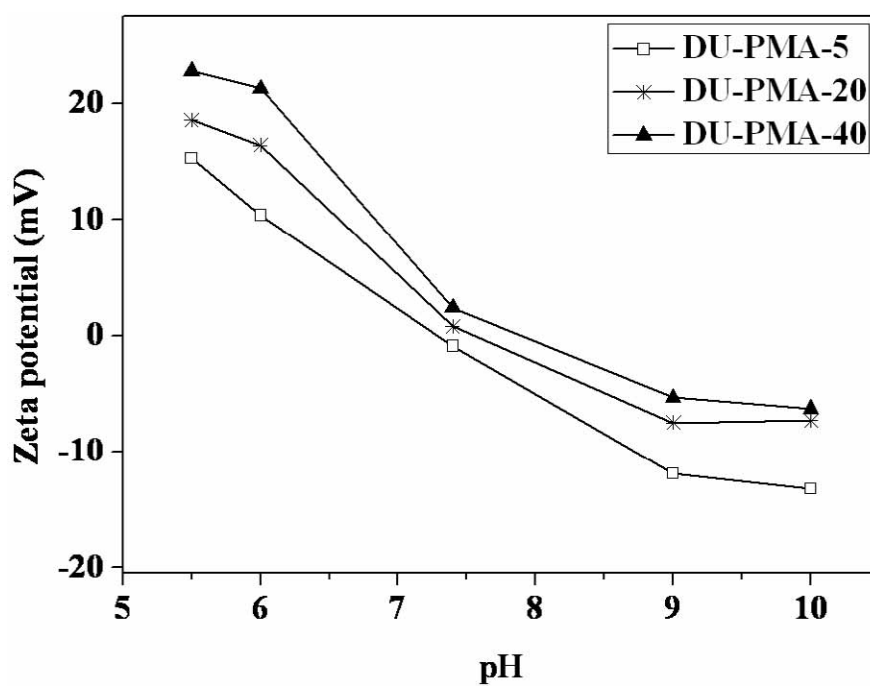

Figure S8. Zeta potential vs pH plot of DU-PMA samples.
